# Supplementary material for: Transposable elements that have recently been mobile in the human genome
Source: PubMed Central journal article supplement (PMC8567694; doi:10.1186/s12864-021-08085-0), 2021-11-03
Supplement: 12864_2021_8085_MOESM1_ESM.pdf [file 12864_2021_8085_MOESM1_ESM.pdf]

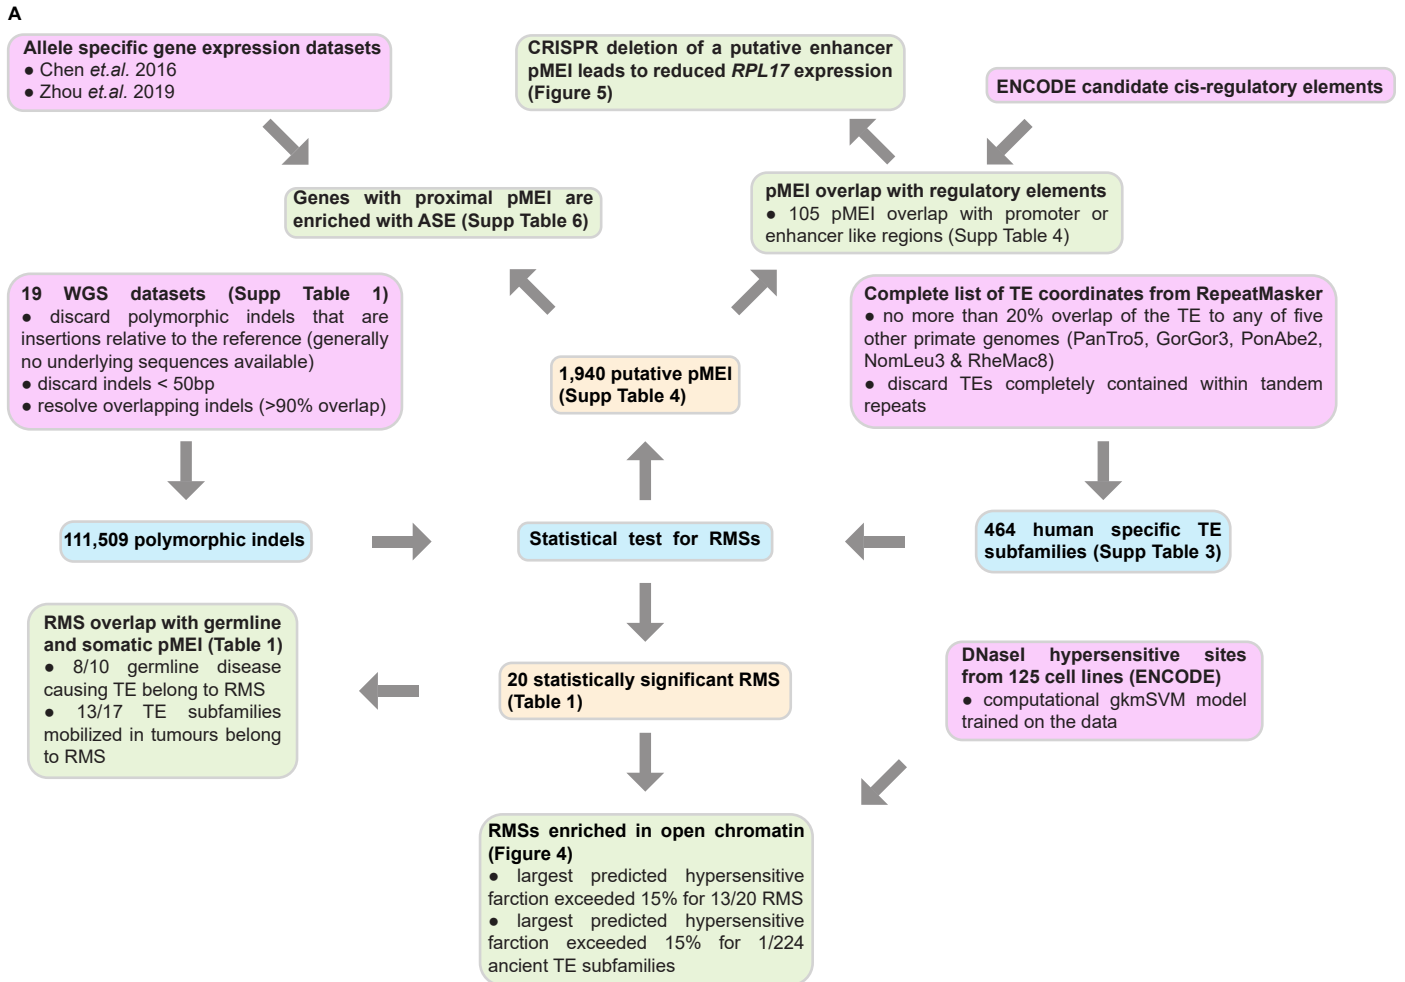

**B**

**Glossary of important terms:**

|                           |   |                                                                                                                                                                                                                            |
|---------------------------|---|----------------------------------------------------------------------------------------------------------------------------------------------------------------------------------------------------------------------------|
| <b>repetitive regions</b> | = | regions of the genome where the underlying DNA sequence is repeated in multiple locations. TE are a subset of repetitive regions. Other examples include satellite and ribosomal DNA as well as segmental duplications     |
| <b>TE</b>                 | = | transposable elements, DNA sequences that have the ability to move (transpose) to new locations in the genome                                                                                                              |
| <b>RMS</b>                | = | recently mobile subfamilies, TE subfamilies that have been mobile in extant human populations                                                                                                                              |
| <b>pMEI</b>               | = | polymorphic mobile element insertion, a TE insertion that is polymorphic within human populations and has (a) no primate orthologues and (b) matching boundaries (>90% mutual overlap) with at least one polymorphic indel |
| <b>indel</b>              | = | a genetic mutation caused by the insertion or deletion of a segment of DNA                                                                                                                                                 |
